# Supplementary material
Source: PubMed Central journal article supplement (PMC3896147)
Supplement: 1321060111_pnas.201321060SI.pdf [file 1321060111_pnas.201321060SI.pdf]

# Supporting Information

Furman et al. 10.1073/pnas.1321060111

## SI Materials and Methods

**Serological Response to Trivalent Inactivated Seasonal Influenza Vaccine.** The seroconversion rate (percent of individuals with a fourfold or greater change in their post- versus prevaccination microneutralization titer) was computed for each strain and for each group of individuals. The largest differences between males and females were observed for the H3N2 strain. Thus, the vaccine response was modeled as a binary variable (fold increase  $\geq 4$  to the H3N2 strain) in logistic regression analyses.

**Gene Module Construction.** First, gene probes were filtered by variance and normalized. Hierarchical agglomerative clustering was performed to derive 109 modules. For each gene module, a set of regulatory genes (regulatory program) was assigned based on regression analysis of genes in the modules onto expression of transcription factors. This was conducted using the LARS-EN algorithm (1). The LARS-EN algorithm provides fits of increasing numbers of predictors. To select the best model among the outputs of LARS-EN, we assessed the quality of the resulting models by the Akaike information criterion (AIC) (2), with sample-specific terms weighted by module variance. The fit with the best AIC score was selected for each module. Detailed statistical procedures have been described (3).

**Interaction Analysis and Modeling of Vaccine Responsiveness.** Potential confounders were identified if they modified the estimates of the sex effect on the vaccine response by more than 20%. A forward strategy was performed starting with a basic model including the sex covariate only.

To identify possible gene module candidates that explain the differences observed in vaccine response, we tested for marginal interactions between gene modules and the sex variable that associate with the neutralization antibody titer outcome (above). To do so, we used the Interact package (<http://cran.r-project.org/web/packages/Interact/index.html>), which searches for interactions in a binary response model using permutation methods to estimate false discovery rates (FDRs). The significance threshold was set at an FDR of  $<10\%$  ( $Q < 0.1$ ).

For the estimation of the regression coefficients and odds ratios in the response to vaccination, we conducted simple logistic regression with the categorical variable corresponding to the seroconversion to the H3N2 strain. The following formulas were used in the different models.

### Model 1.

$$\text{logit}(y_i) = \mu + \beta_s \text{male}_i + \beta_c \text{crp}_i + \beta_{m42} \text{mod\_42}_i + \varepsilon_i$$

### Model 2.

$$\begin{aligned} \text{logit}(y_i) = \mu + \beta_s \text{male}_i + \beta_c \text{crp}_i + \beta_{m42} \text{mod\_42}_i + \beta_{m52} \text{mod\_52}_i \\ + \beta_{sm52} \text{male} : \text{mod\_52}_i + \varepsilon_i \end{aligned}$$

### Model 3.

$$\begin{aligned} \text{logit}(y_i) = \mu + \beta_c \text{crp}_i + \beta_{m42} \text{mod\_42}_i + \beta_{m52} \text{mod\_52}_i + \beta_a \text{age}_i \\ + \beta_{Tlo} \text{maleTlo}_i + \beta_{Thi} \text{maleThi}_i + \beta_{Tlo:m52} \text{maleTlo} : \text{mod\_52}_i \\ + \beta_{Thi:m52} \text{maleThi} : \text{mod\_52}_i + \varepsilon_i, \end{aligned}$$

where  $y_i$  is the binary response to H3N2 for the  $i$ th individual,  $\mu$  is the average response for females,  $\text{male}_i$  is a dichotomic variable (1 for male, 0 for female),  $\text{crp}_i$  is the CRP level of the  $i$ th individual,  $\text{mod\_42}_i$  is the 42nd module median expression level of the  $i$ th individual,  $\text{mod\_52}_i$  is the 52nd module expression level of the  $i$ th individual,  $\text{maleTlo}_i$  is a dichotomic variable (1 for males with low levels of testosterone, that is, below the median of the male group; 0 for females and males with high levels of testosterone; see below),  $\text{maleTlo} : \text{mod\_52}_i$  is the interaction term of  $\text{mod\_52}_i$  and  $\text{maleTlo}_i$  for the  $i$ th individual,  $\text{maleThi}_i$  is a dichotomic variable (1 for males with high levels of testosterone, that is, above the median of the male group; 0 for females and for males with low levels of testosterone),  $\text{maleThi} : \text{mod\_52}_i$  is the interaction term of  $\text{mod\_52}_i$  and  $\text{maleThi}_i$ , and  $\varepsilon_i$  is the error term for the  $i$ th individual.

1. Zou H, Hastie T (2005) Regularization and variable selection via the elastic net. *Journal of the Royal Statistical Society, Series B* 67:301–320.
2. Akaike H (1974) A new look at the statistical model identification. *IEEE Trans Automat Contr* 19(6):716–723.

3. Furman D, et al. (2013) Apoptosis and other immune biomarkers predict influenza vaccine responsiveness. *Mol Syst Biol* 9:659.



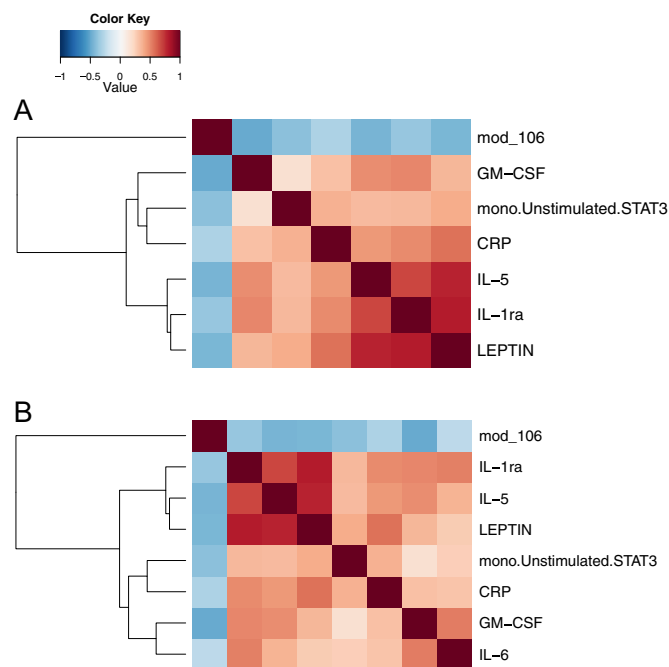

**Fig. S3.** Heat map of the correlation structure for sex-related immune features. A correlation matrix (Spearman method) was computed for all seven sex-related immune features in all individuals without (A) or with IL-6 (B), and hierarchical clustering (with Ward's method and Euclidian distance) was conducted. mono.Unstimulated.STAT3 clustered with CRP and to a lesser extent with GM-CSF (A, dendrogram), as well as with CRP and to a lesser extent with IL-6 and GM-CSF (B, dendrogram).

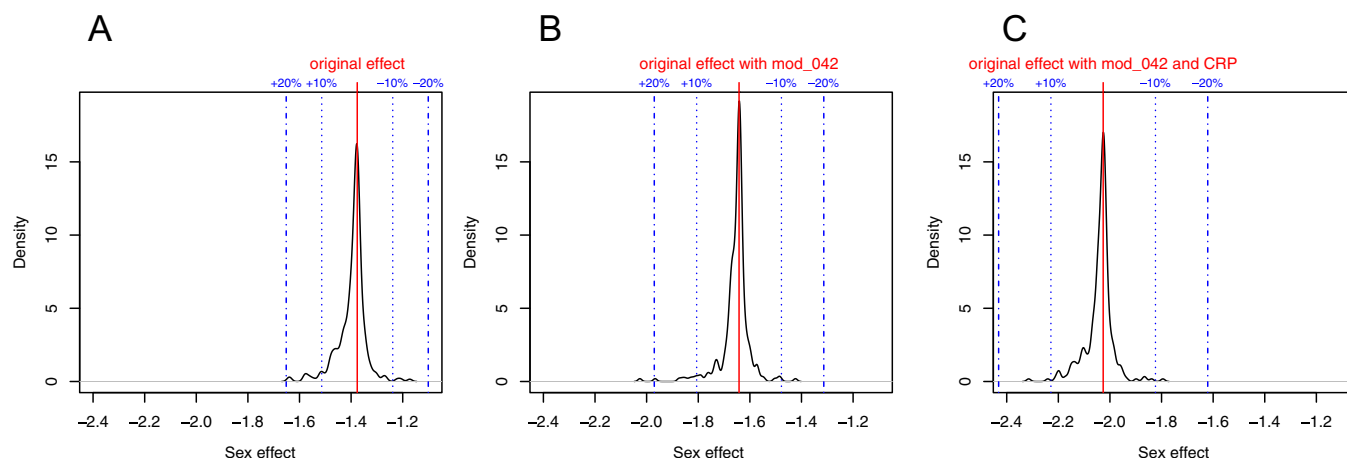

**Fig. S4.** Modifications in sex effect on vaccine response after adjusting for confounding factors. Forward stepwise logistic regression analysis was conducted to identify candidate confounders. (A) Regression coefficient of sex before adjustments. (B) Regression coefficient estimate for sex after adjusting for gene module 042. (C) Regression coefficient of sex after adjusting for gene module 042 and CRP levels. Negative values (x axis) indicate higher vaccine response in females.

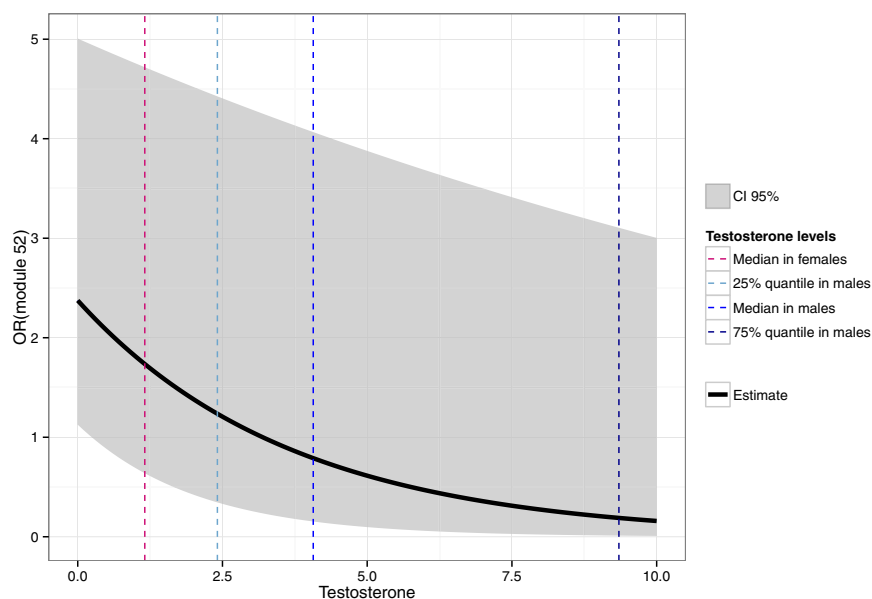

**Fig. S5.** Odds ratio for vaccine response based on expression of module 052 and testosterone levels. Logistic regression analysis was conducted on the antibody-neutralizing activity based on expression of genes in module 052 and the testosterone levels as a continuous measurement. The estimated odds ratio (OR) for the antibody-neutralizing response is shown (black continuous line). Red, light blue, blue, and dark blue dashed lines indicate the median testosterone levels in females and first, second, and third quartiles of testosterone levels for males. CI, confidence interval.



**Table S1. Cont.**

| Gene symbol | Entrez ID | Module assignment |
|-------------|-----------|-------------------|
| CYorf15A    | 246126    | 106               |
| NAAA        | 27163     | 106               |
| NFU1        | 27247     | 106               |
| GTF3A       | 2971      | 106               |
| MTCP1       | 4515      | 106               |
| PPA1        | 5464      | 106               |
| PID1        | 55022     | 106               |
| PLCXD1      | 55344     | 106               |
| PRKY        | 5616      | 106               |
| RPS4Y1      | 6192      | 106               |
| CYorf15B    | 84663     | 106               |
| ACCS        | 84680     | 106               |
| DDX3Y       | 8653      | 106               |
| EIF1AY      | 9086      | 106               |
| KIAA0020    | 9933      | 106               |
